# Supplementary material for: Spectral, electrochemical, and photophysical studies of a magnesium porphyrin–fullerene dyad
Source: Royal Society of Chemistry journal article supplement (doi:10.1039/b507673k), 2005-01-01
Supplement: b507673k.pdf [file b507673k.pdf]

**ESI**

**Spectral, electrochemical, and photochemical studies of a magnesium porphyrin-fullerene dyad**

**Mohamed E. El-Khouly,<sup>a</sup> Yasuyuki Araki,<sup>a</sup> Osamu Ito,<sup>\*a</sup> Suresh Gadde,<sup>b</sup> Amy L. McCarty,<sup>b</sup> Paul A. Karr,<sup>b</sup> Melvin E. Zandler,<sup>b</sup> and Francis D'Souza<sup>\*b</sup>**

<sup>a</sup>*Institute of Multidisciplinary Research for Advanced Materials, Tohoku University, Katahira, Sendai, 980-8577, JAPAN, FAX: +81-22-217-5610, E-mail: [ito@tagen.tohoku.ac.jp](mailto:ito@tagen.tohoku.ac.jp)*

<sup>b</sup>*Department of Chemistry, Wichita State University, 1845 Fairmount, Wichita, KS 67260-0051, USA, FAX: +316-978-3431, E-mail: [Francis.DSouza@wichita.edu](mailto:Francis.DSouza@wichita.edu)*

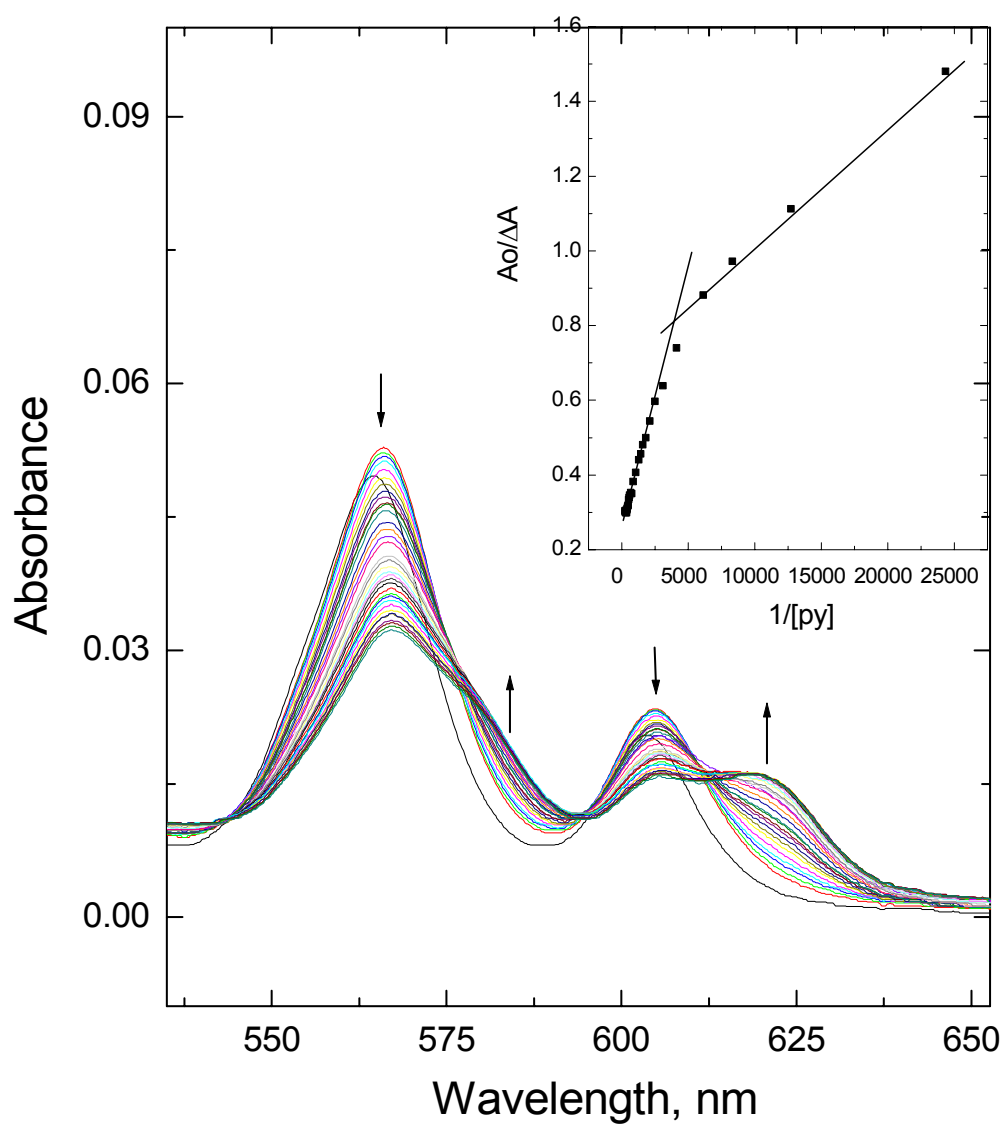

**Fig. S1** Visible spectral changes observed for MgP<sub>0</sub>-C<sub>60</sub> on increasing addition of pyridine in toluene. The inset figure shows the Benesi-Hildebrand plot of the spectral data monitored at 624 nm.

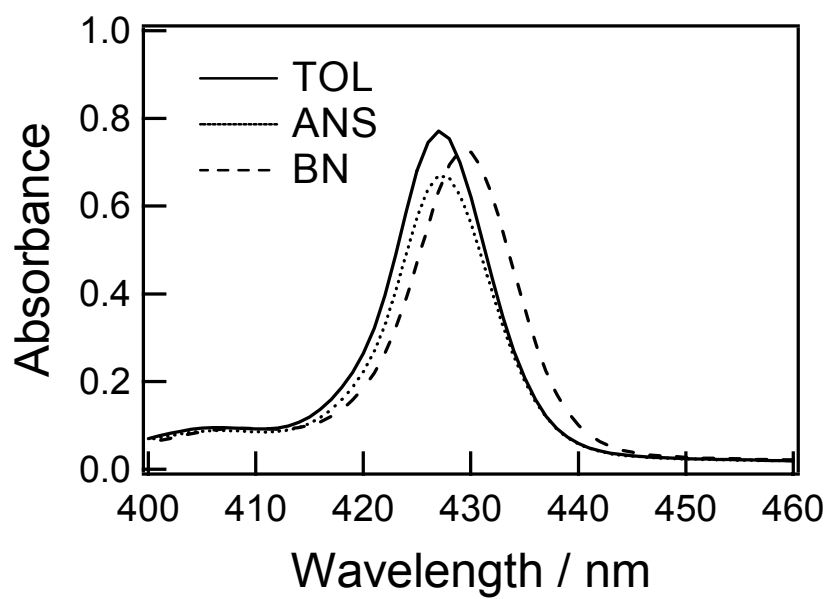

**Fig. S2.** Steady-state absorption spectra of MgPo~C<sub>60</sub> dyad in toluene, anisole and benzonitrile.

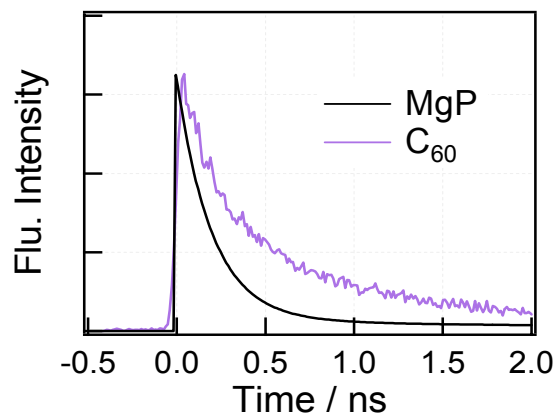

**Fig. S3** Fluorescence decay profiles of the MgP entity (monitored at 600 - 700nm) and the C<sub>60</sub> entity (monitored at 700 - 800nm) of MgP<sub>o</sub>~C<sub>60</sub> dyad in toluene.

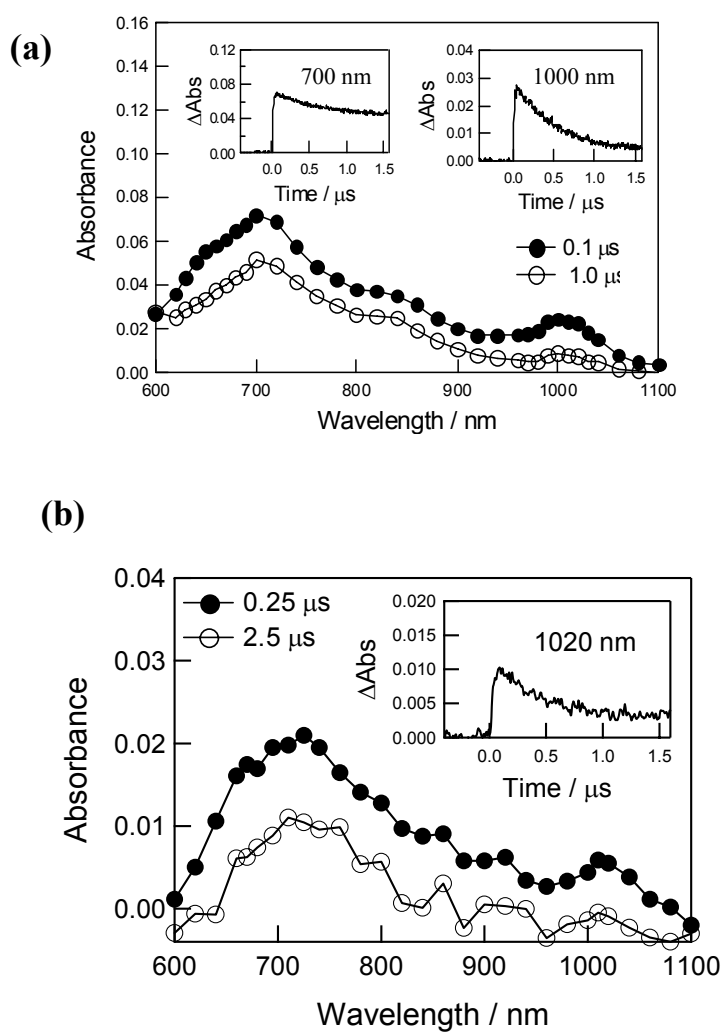

**Fig. S4** Nanosecond transient absorption spectra of MgPO- $C_{60}$  (0.05 mM) in argon saturated solution after the 532 nm-laser irradiation; (a) benzonitrile and (b) anisole at 0.1  $\mu$ s ( $\bullet$ ) and 1.0  $\mu$ s ( $\circ$ ). Inset: Time profiles.

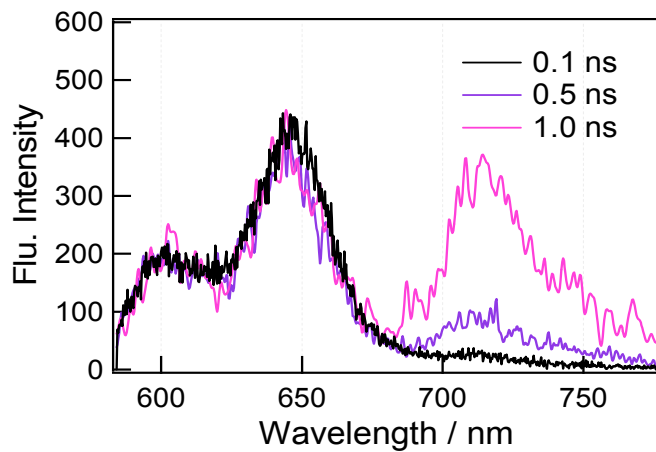

**Fig. S5** Time resolved spectra of ZnPo~C<sub>60</sub> in toluene.  $\lambda_{\text{ex}} = 400$  nm.

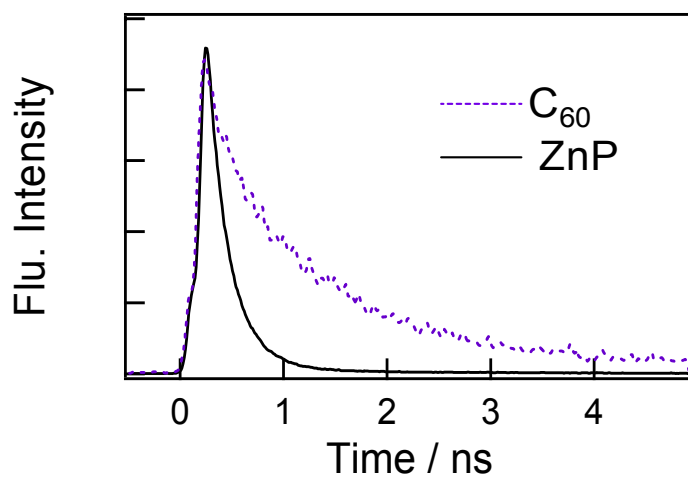

**Fig. S6** Fluorescence decay profiles of the ZnP entity (monitored at 600 - 700nm) and the C<sub>60</sub> entity (monitored at 700 - 78nm) of ZnPo~C<sub>60</sub> dyad in toluene.

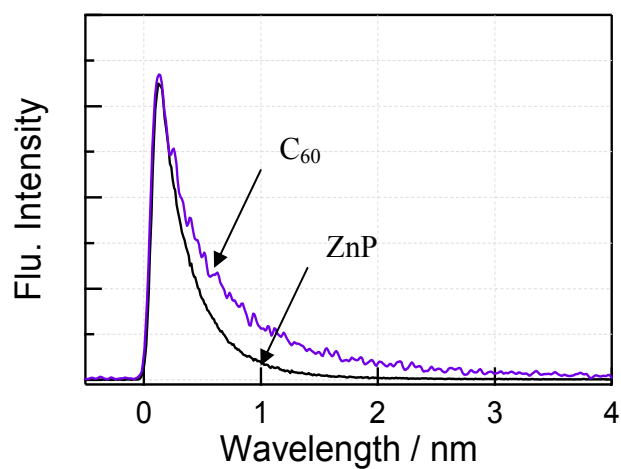

**Fig. S7** Fluorescence decay profiles of the ZnP entity (monitored at 600 – 700 nm) and the C<sub>60</sub> entity (monitored at 700 – 780 nm) of ZnP<sub>o</sub>-C<sub>60</sub> dyad in *o*-dichlorobenzene.

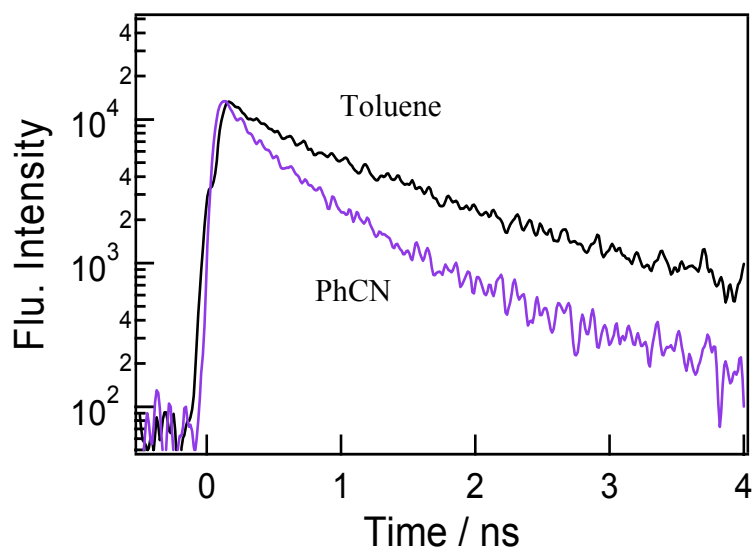

**Fig. S8** Logarithmic plots of fluorescence decay profiles of the C<sub>60</sub> entity (monitored at 700 - 780nm) of ZnP<sub>o</sub>-C<sub>60</sub> dyad in toluene and benzonitrile (PhCN).
